# Supplementary material for: The role of undergraduate medical students training in respect for patient confidentiality
Source: PubMed Central journal article supplement (PMC8117324; doi:10.1186/s12909-021-02689-6), 2021-05-12
Supplement: 12909_2021_2689_MOESM1_ESM.pdf [file 12909_2021_2689_MOESM1_ESM.pdf]

## Questionnaire on the right to privacy of patients during the clinical practice sessions of medical students in Spain

The aim of this questionnaire is to analyze some aspects related to the privacy of patients who are being attended in the presence of students of subjects related to Health Sciences in hospitals and health centres corresponding to their training.

This survey is directed at degree students in the 6th year of Medicine and is based on their experience during clinical practice sessions carried out this year. It is completely anonymous and confidential. Please answer the questions with a maximum of honesty, marking the options best suited in accordance with your experience. **Sixth year students are understood to be those** whose enrolment credits are for 70% of the subjects of the 6th year in the study plan. The time to answer the questionnaire will be not more than 5 minutes.

**Age (in years): \***

**Sex: \***

- Female
- Male

**In the academic year 2019/20 you have done clinical practice sessions at the .....: \***

- |                                                                                   |                                                                                    |
|-----------------------------------------------------------------------------------|------------------------------------------------------------------------------------|
| <input type="checkbox"/> Universidad Alfonso X el Sabio                           | <input type="checkbox"/> Universidad de Santiago de Compostela                     |
| <input type="checkbox"/> Universidad Autónoma de Madrid                           | <input type="checkbox"/> Universidad de Sevilla                                    |
| <input type="checkbox"/> Universidad Católica de Murcia                           | <input type="checkbox"/> Universidad de Valladolid                                 |
| <input type="checkbox"/> Universidad Católica de Valencia                         | <input type="checkbox"/> Universidad de Zaragoza                                   |
| <input type="checkbox"/> Universidad CEU Cardenal Herrera                         | <input type="checkbox"/> Universidad del País Vasco/ Euskal Herriko Unibertsitatea |
| <input type="checkbox"/> Universidad CEU San Pablo                                | <input type="checkbox"/> Universidad Europea de Madrid                             |
| <input type="checkbox"/> Universidad Complutense de Madrid                        | <input type="checkbox"/> Universidad Francisco de Vitoria                          |
| <input type="checkbox"/> Universidad de Alcalá                                    | <input type="checkbox"/> Universidad Internacional de Catalunya                    |
| <input type="checkbox"/> Universidad de Cádiz                                     | <input type="checkbox"/> Universidad Miguel Hernández                              |
| <input type="checkbox"/> Universidad de Cantabria                                 | <input type="checkbox"/> Universidad Rey Juan Carlos                               |
| <input type="checkbox"/> Universidad de Castilla La Mancha, Campus de Albacete    | <input type="checkbox"/> Universitat Autònoma de Barcelona                         |
| <input type="checkbox"/> Universidad de Castilla La Mancha, Campus de Ciudad Real | <input type="checkbox"/> Universitat de Barcelona, Campus de Bellvitge             |
| <input type="checkbox"/> Universidad de Córdoba                                   | <input type="checkbox"/> Universitat de Barcelona, Campus del Clínic               |
| <input type="checkbox"/> Universidad de Extremadura                               | <input type="checkbox"/> Universitat de Girona                                     |
| <input type="checkbox"/> Universidad de Granada                                   | <input type="checkbox"/> Universitat de Lleida                                     |
| <input type="checkbox"/> Universidad de la Laguna                                 | <input type="checkbox"/> Universitat de València                                   |
| <input type="checkbox"/> Universidad de las Palmas de Gran Canaria                | <input type="checkbox"/> Universitat Jaume I                                       |
| <input type="checkbox"/> Universidad de Málaga                                    | <input type="checkbox"/> Universitat Pompeu Fabra                                  |
| <input type="checkbox"/> Universidad de Murcia                                    | <input type="checkbox"/> Universitat Rovira i Virgili                              |
| <input type="checkbox"/> Universidad de Navarra                                   |                                                                                    |
| <input type="checkbox"/> Universidad de Oviedo                                    |                                                                                    |
| <input type="checkbox"/> Universidad de Salamanca                                 |                                                                                    |

1. **The right to privacy of a patient refers to: (tick the options that you think are correct): \***
  - The confidential nature of their health data
  - Only authorized persons being able to access the above data
  - Information that the patient has told us in confidence
  - None of the above
  
2. **The obligation of confidentiality with respect to a patient affects: (tick the options that you think are correct): \***
  - Their private health data (including degrees of disability and genetic data)
  - Data from their biographies and their environment that if known by others could affect them
  - The data contained in their clinical history
  - Data obtained by verbal communication, recordings, videos, etc.
  - An obligation that is kept up even when the patient has died
  - None of the above
  
3. **During the clinical practice sessions in the past year have you signed a commitment to confidentiality in order to carry them out?: \***
  - Yes
  - No
  - Don't know/ No opinion
  
4. **During your clinical practice sessions in the past year indicate how often you knew who was the instructor (clinical tutor) in charge of supervising your training during those sessions: \***
  - Always
  - Often
  - Sometimes
  - Seldom
  - Never
  
5. **During your clinical practice sessions in the past year, tick how often you wore an identification tag with your photograph, name and surname, and which was visible...: \***
  - Always
  - Often
  - Sometimes
  - Seldom
  - Never
  
6. **Did the fact of not wearing an identification tag result in any reaction or call to attention from your clinical session tutor?.. \***
  - Yes
  - No
  - Don't know/No opinion
  
7. **With respect to your clinical practice sessions in the past year, tick how often you think that the patient had express knowledge of your being a degree student (instead of a resident or associate doctor, for instance)?: \***

- Always
- Often
- Sometimes
- Seldom
- Never

8. **With respect to your clinical practice sessions during the past year, tick how often you remember the presence of 4 or more Health Sciences students attending to one same patient:**

- Always
- Often
- Sometimes
- Seldom
- Never

9. **During your clinical practice sessions in the past year, have you at any time accessed the electronic medical record of a patient using the authentication mechanism (code or password) of any healthcare professional which the latter gave to you?:**

- Yes
- No

10. **Did you have the express consent (spoken or written) of the patient?:**

- Yes
- No
- Don't know/ No opinion

11. **With respect to your clinical practice sessions in the past year, tick how often you have accessed clinical histories in which the clinical data of a patient were found to be dissociated (separate) from their corresponding personal data (name, surnames, ID, etc.):**

- Always
- Often
- Sometimes
- Seldom
- Never

12. **During your clinical practice sessions in the past year, have you possessed photocopies with information from the clinical history of a patient, with their respective clinical and personal data, outside the healthcare institutions where you received those sessions?:**

- Yes
- No

13. **Did you obtain the express consent (spoken or written) of the patient?:**

- Yes
- No
- Don't know/ No answer

14. **Answer this question if drafting your final degree project implies the use of the clinical data of patients: have you been supplied with patients' clinical data separated from their corresponding personal data (anonymized)?:**

- Yes
- No
- Don't know/ No opinion

Many thanks for taking part and be kind enough to circulate this questionnaire.
